# Supplementary material for: Predicting and Evaluating the Epidemic Trend of Ebola Virus Disease in the 2014-2015 Outbreak and the Effects of Intervention Measures
Source: PLoS One. 2016 Apr 6;11(4):e0152438. doi: 10.1371/journal.pone.0152438 (PMC4822846; doi:10.1371/journal.pone.0152438)
Supplement: S1 Table — (DOCX) [file pone.0152438.s001.docx]

**S1 Table. The No. of cumulative cases and deaths published by WHO**

| **Data** | **No. of cumulative confirmed and suspected cases** | **No. of cumulative deaths** |
| --- | --- | --- |
| | 2014-04-01 | | --- | | 2014-04-04 | | 2014-04-11 | | 2014-04-15 | | 2014-04-17 | | 2014-04-24 | | 2014-04-29 | | 2014-05-08 | | 2014-05-17 | | 2014-05-21 | | 2014-05-27 | | 2014-05-30 | | 2014-06-04 | | 2014-06-12 | | 2014-06-18 | | 2014-06-26 | | 2014-07-02 | | 2014-07-04 | | 2014-07-09 | | 2014-07-12 | | 2014-07-14 | | 2014-07-17 | | 2014-07-21 | | 2014-07-24 | | 2014-07-26 | | 2014-07-29 | | 2014-07-31 | | 2014-08-03 | | 2014-08-05 | | 2014-08-07 | | 2014-08-10 | | 2014-08-12 | | 2014-08-14 | | 2014-08-20 | | 2014-08-25 | | 2014-08-28 | | 2014-09-01 | | 2014-09-04 | | 2014-09-08 | | 2014-09-11 | | 2014-09-15 | | 2014-09-17 | | 2014-09-19 | | 2014-09-22 | | 2014-09-25 | | 2014-09-29 | | 2014-10-01 | | 2014-10-06 | | 2014-10-11 | | 2014-10-13 | | 2014-10-18 | | 2014-10-24 | | 2014-10-27 | | 2014-10-29 | | 2014-11-03 | | 2014-11-05 | | 2014-11-10 | | 2014-11-12 | | 2014-11-17 | | 2014-11-24 | | 2014-12-01 | | 2014-12-08 | | 2014-12-15 | | 2014-12-22 | | 2014-12-29 | | 2015-01-05 | | 2015-01-12 | | 2015-01-19 | | 2015-01-26 | | | 163 | | --- | | 169 | | 209 | | 215 | | 220 | | 233 | | 243 | | 245 | | 270 | | 309 | | 354 | | 438 | | 474 | | 528 | | 599 | | 759 | | 844 | | 888 | | 964 | | 1048 | | 1093 | | 1201 | | 1323 | | 1440 | | 1603 | | 1711 | | 1779 | | 1848 | | 1975 | | 2127 | | 2240 | | 2473 | | 2615 | | 3069 | | 3707 | | 4001 | | 4366 | | 4846 | | 5339 | | 5762 | | 6263 | | 6574 | | 6808 | | 7192 | | 7492 | | 8033 | | 8386 | | 8997 | | 9693 | | 9964 | | 11868 | | 12647 | | 13041 | | 13268 | | 14098 | | 14413 | | 15145 | | 15351 | | 15935 | | 17145 | | 17942 | | 18603 | | 19497 | | 20206 | | 20747 | | 21296 | | 21724 | | 22092 | | 22495 | | | 82 | | --- | | 88 | | 102 | | 108 | | 129 | | 136 | | 143 | | 153 | | 162 | | 164 | | 181 | | 200 | | 208 | | 231 | | 252 | | 337 | | 338 | | 467 | | 518 | | 539 | | 603 | | 632 | | 660 | | 672 | | 729 | | 826 | | 887 | | 932 | | 961 | | 1013 | | 1069 | | 1145 | | 1229 | | 1350 | | 1427 | | 1552 | | 1848 | | 2089 | | 2177 | | 2375 | | 2586 | | 2746 | | 2900 | | 3043 | | 3159 | | 3286 | | 3439 | | 3865 | | 3988 | | 4485 | | 4811 | | 4877 | | 4960 | | 5026 | | 5087 | | 5160 | | 5177 | | 5191 | | 5420 | | 5459 | | 5689 | | 6070 | | 6388 | | 6915 | | 7588 | | 7905 | | 8235 | | 8429 | | 8641 | |
